# Supplementary material for: An invisible private 2D barcode design and implementation with tunable fluorescent nanoparticles
Source: Royal Society of Chemistry journal article supplement (doi:10.1039/c9ra05774a), 2019-01-01
Supplement: c9ra05774a1.pdf [file c9ra05774a1.pdf]

## An invisible privacy 2D barcodes design and implementation with tunable fluorescent nanoparticles

Kunkun Jiang<sup>a</sup>, Dandan Xu<sup>a</sup>, Zhongyang Liu<sup>a</sup>, Weiwei Zhao<sup>a</sup>, Hongjun Ji<sup>a</sup>, Jiaheng Zhang<sup>a</sup>, Mingyu Li<sup>a</sup>, Tingting Zheng<sup>b</sup>, Huanhuan Feng<sup>a\*</sup>

The excitation and emission spectra of Anthracene and Coumarin 6 are presenting in Fig.S1.

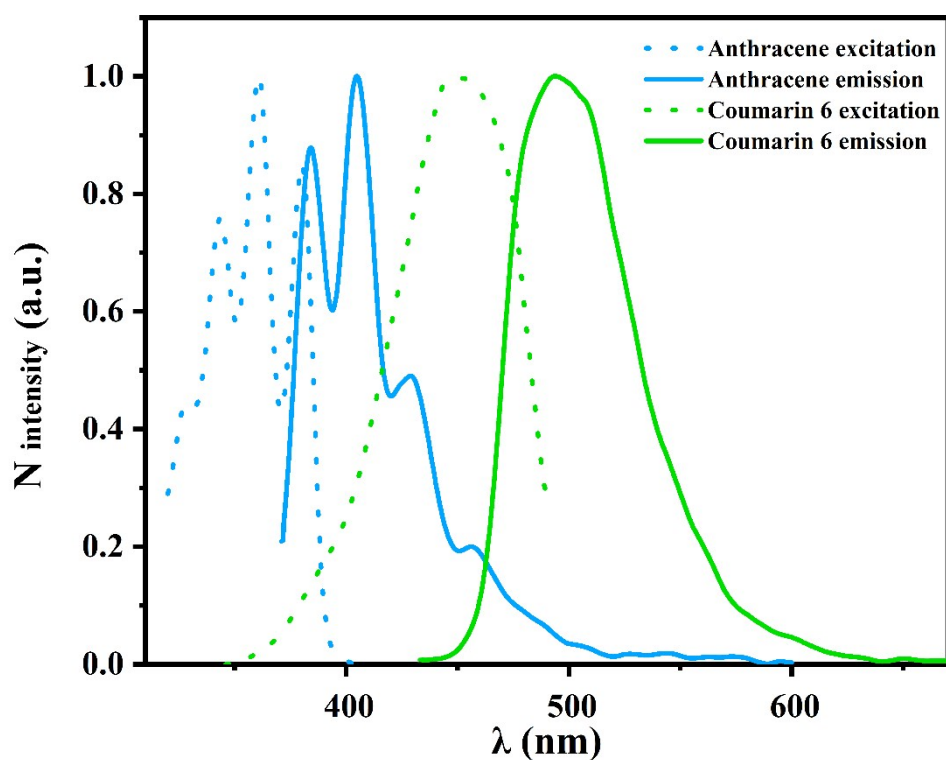

Fig.S1. Comparison of excitation and emission spectra of Anthracene and Coumarin 6.

We use confocal microscopy to observe the Anthracene and Coumarin 6 fluorescent nanoparticles morphology and their emission color. It confirms that the fluorescence was from the fabricated fluorescent nanoparticles. The images of split channels are presenting in Fig.S2.

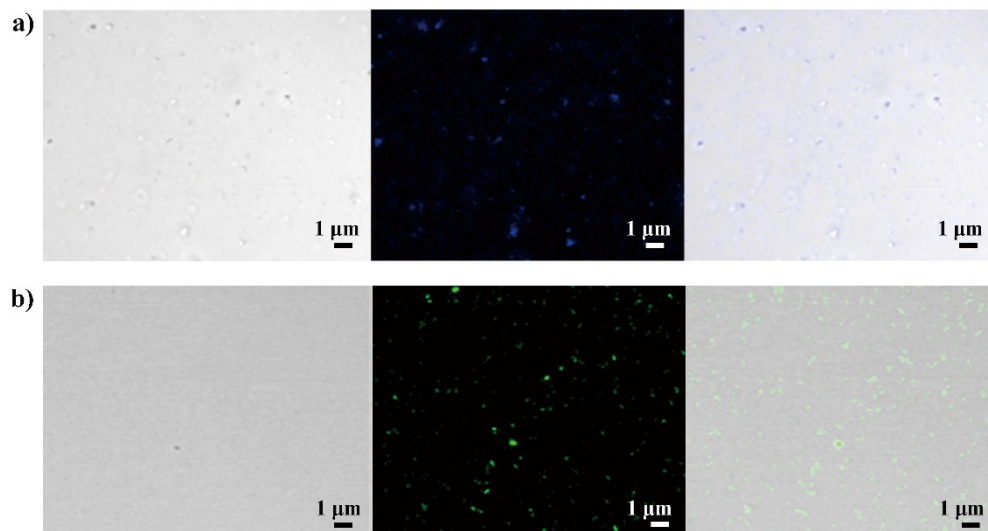

**Fig.S2.** a) The confocal microscopy images of Anthracene doped fluorescent nanoparticles; b) The confocal microscopy images of Coumarin 6 doped fluorescent nanoparticles. The left ones are bright field microscopy images. The ones in the middle are confocal microscopy images. The right ones are merged images of bright field and confocal microscopy to locate the emission spots.

As shown in Fig.S3a, common A4 paper ①, Dowling paper② and original paper ③ were compared under ultraviolet light excitation and ultraviolet light excitation. In addition, we wrote and compared on different sizes of paper using PS fluorescent nanoparticles suspension and the mixture of PS fluorescent nanoparticles and glycerol were used in order to verify the resolution of ink writing on paper (Fig.S3b, S3c, S3d).

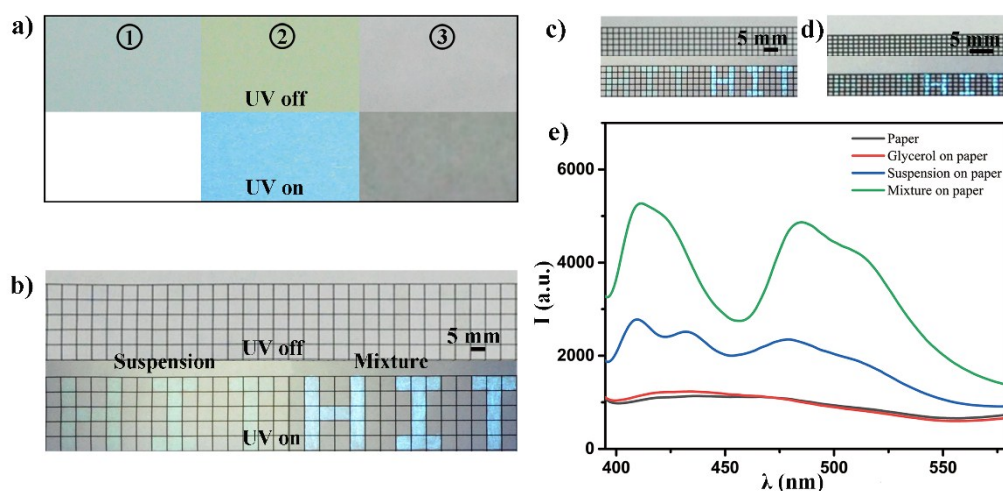

**Fig.S3.** Comparison of UV free and UV excited contrasts on different substrate. a) common A4 paper ①, Dowling paper② and original paper ③; b) The “HIT” logo is using as a pattern for printing test of suspension of PS fluorescent nanoparticles with/without addition of glycerol of resolution test of 5 mm; c) and d) are Resolution test of 2 mm and 1 mm; e) The fluorescence spectrum of different substrates.

The original paper without and with Anthracene nanoparticles and Coumarin 6 nanoparticles were observed under SEM as Fig.S4 shows.

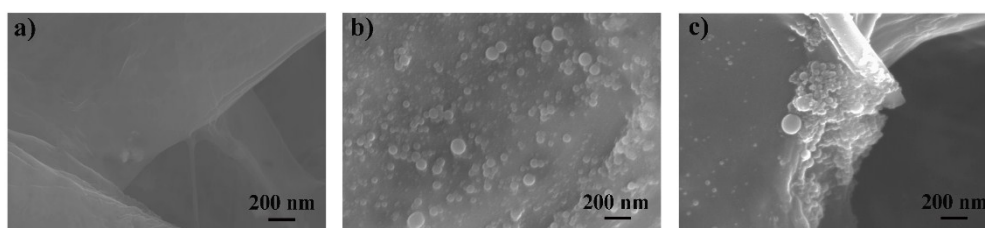

**Fig.S4.** Images of SEM. a) The original paper; b) The original paper with Anthracene nanoparticles; c) The original paper with Coumarin 6 nanoparticles.

The durability enhancement experiments are presented in Fig.S5.

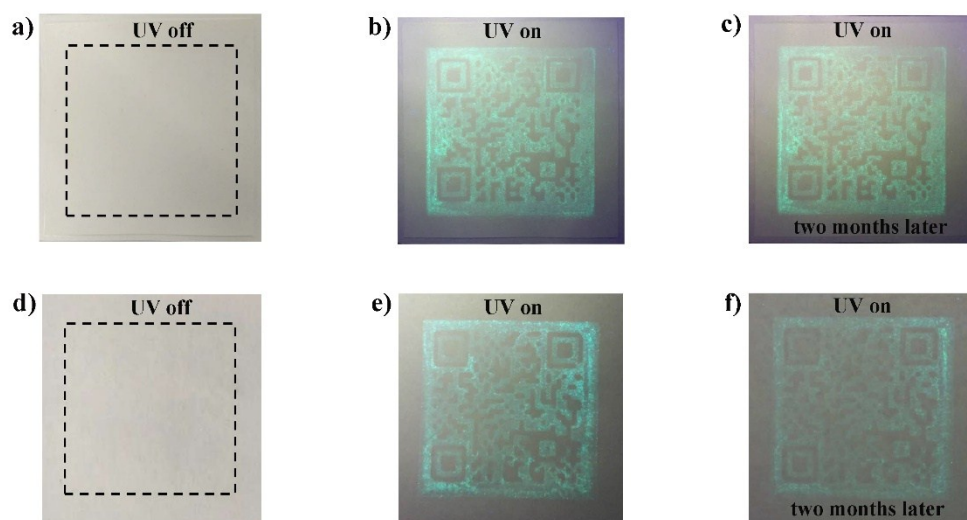

**Fig.S5.** a) The sample with sealed treatment; b) The sample with sealed treatment under UV excitation; c) The sample with sealed treatment under UV excitation after two months; d) The sample without sealed treatment; e) The sample without sealed treatment under UV excitation; f) The sample without sealed treatment under UV excitation after two months.

## Ratios of molarity

The relative molar mass of Anthracene is 178.22,  $M_{(Ant)} = 178.22 \text{ g/mol}$ .

The relative molar mass of Coumarin 6 is 350.43,  $M_{(Cou)} = 350.43 \text{ g/mol}$ .

Let us take the 2 ml toluene solution in the "Experimental Process" section as an example. Dyes of 0.001 wt % was added to 2 ml of toluene solution.

$$n = \frac{m}{M}, \quad c = \frac{n}{V}, \text{ we can get } c = \frac{m}{MV}.$$

$$c_{(Ant)} = \frac{m_{(Ant)}}{M_{(Ant)}V}, \quad c_{(Cou)} = \frac{m_{(Cou)}}{M_{(Cou)}V}, \text{ we can get } \frac{c_{(Ant)}}{c_{(Cou)}} = \frac{m_{(Ant)}M_{(Cou)}}{m_{(Cou)}M_{(Ant)}}.$$

The total mass of the dye is  $m$ ,  $m = m_{Ant} + m_{Cou}$ .  $m_{Ant}$  is the mass of Anthracene.  $m_{Cou}$  is the mass of Coumarin 6.  $n$  is amount of substance.  $c$  is molarity.  $V$  is volume of toluene solution.

When the mass ratio of Anthracene to Coumarin 6 dye is 99%:1%,

$$\frac{c_{(Ant)}}{c_{(Cou)}} = \frac{m_{(Ant)}M_{(Cou)}}{m_{(Cou)}M_{(Ant)}} = \frac{99 \times 350.43}{1 \times 178.22} \approx \frac{195}{1}.$$

## Table list

**Table S1.** FRET efficiency calculation of samples of S1 series via fluorescent spectrum.

| Sample | Anthracene:<br>Coumarin 6<br>mass ratio (%) | Anthracene<br>intensity<br>peak (a.u.) | Coumarin6<br>intensity peak<br>(a.u.) | FRET<br>efficiency |
|--------|---------------------------------------------|----------------------------------------|---------------------------------------|--------------------|
| S1_1   | 99:1                                        | 38863                                  | 7757                                  | 0.607              |
| S1_2   | 95:5                                        | 19760                                  | 10687                                 | 0.855              |
| S1_3   | 90:10                                       | 27537                                  | 16693                                 | 0.871              |
| S1_4   | 85:15                                       | 27158                                  | 24645                                 | 0.914              |
| S1_5   | 80:20                                       | 17793                                  | 19174                                 | 0.927              |
| S1_6   | 75:25                                       | 14898                                  | 18200                                 | 0.936              |
| S1_7   | 70:30                                       | 21484                                  | 48518                                 | 0.965              |
| S1_8   | 65:35                                       | 13249                                  | 26886                                 | 0.961              |
| S1_9   | 60:40                                       | 12944                                  | 28386                                 | 0.964              |
| S1_10  | 55:45                                       | 10808                                  | 48273                                 | 0.982              |

**Table S2.** FRET efficiency calculation of samples of S1 series via fluorescent lifetime.

| Sample | Lifetime(ns) | FRET<br>efficiency |
|--------|--------------|--------------------|
| S1_1   | 2.776        | 0.001              |
| S1_2   | 2.475        | 0.109              |
| S1_3   | 2.508        | 0.097              |
| S1_4   | 2.449        | 0.118              |
| S1_5   | 2.415        | 0.131              |
| S1_6   | 2.141        | 0.229              |
| S1_7   | 2.051        | 0.261              |
| S1_8   | 2.079        | 0.251              |
| S1_9   | 2.089        | 0.248              |
| S1_10  | 1.651        | 0.406              |

**Table S3.** FRET efficiency calculation of samples of S2 series via fluorescent spectrum.

| Sample | The mass fractions of Anthracene: Coumarin 6<br>99%:1% | Anthracene intensity peak (a.u.) | Coumarin 6 intensity peak (a.u.) | FRET efficiency |
|--------|--------------------------------------------------------|----------------------------------|----------------------------------|-----------------|
| S2_1   | dye0.1wt%                                              | 14612                            | 2739                             | 0.582           |
| S2_2   | dye0.05wt%                                             | 19417                            | 4940                             | 0.692           |
| S2_3   | dye0.01wt%                                             | 21679                            | 10272                            | 0.835           |
| S2_4   | dye0.001wt%                                            | 32397                            | 25949                            | 0.902           |

**Table S4.** FRET efficiency calculation of samples of S2 series via fluorescent lifetime

| Sample          | S2_1  | S2_2  | S2_3  | S2_4  |
|-----------------|-------|-------|-------|-------|
| Lifetime(ns)    | 2.776 | 2.742 | 2.064 | 2.373 |
| FRET efficiency | 0.001 | 0.013 | 0.257 | 0.109 |

## **Video list**

Video S1 shows the invisibility of our samples without UV excitation. Video S2 shows our samples can be accessed and recognized under UV excitation. Video S3 shows that our samples with sealed treatment still be accessed and recognized under UV excitation. Video S4 shows that our sealed sample enhanced durability after two months.
